# Supplementary material
Source: HighWire-hosted journal article supplement (https://sit.bmj.com/highwire/filestream/420/field_highwire_adjunct_files/0/bmjsit-2021-000104supp001_data_supplement.pdf)
Supplement: bmjsit-2021-000104supp001_data_supplement.pdf [file bmjsit-2021-000104supp001_data_supplement.pdf]

**Supplementary File: Search Strategy****EMBASE / CINAHL / WHO Global Index Medicus**

1. exp cellular phone/
2. exp microcomputers/
3. (smart phone\$ or smartphone\$ or iphone\$ or android or blackberry\$).tw.
4. ((handheld or portable or mobile) adj2 (phone\$ or device\$)).tw.
5. (personal digital assistant\$ or pda).tw.
6. (ipad\$ or tablet\$).tw.
7. text messag\$.tw.
8. sms.tw.
9. (e-health or telemedicine or digital health or wearable\* or mobile health or mHealth or digital health or eHealth or LORAWaN).ti,ab.
10. or/1-9
11. (surgery or surg\*).ti,ab.
12. (oper\$ or post\$).ti,ab.
13. 11 and 12
14. 10 and 13
15. limit 14 to (human and english language and yr="2000 - Current")
16. limit 15 to (article or article in press or "review")

**The Cochrane Library**

1. MeSH descriptor: [Cellular Phone] explode all trees
2. MeSH descriptor: [Microcomputers] explode all trees
3. ("smart phone\*" or smartphone\* or iphone\* or android or blackberry\*):ti,ab
4. ((handheld or portable or mobile) near/2 (phone\* or device\*)):ti,ab
5. ("personal digital assistant\*" or pda):ti,ab
6. (ipad\* or tablet\*):ti,ab
7. "text messag\*":ti,ab
8. sms:ti,ab
9. (e-health or telemedicine or digital health or wearable\* or "mobile health" or mHealth or "digital health" or eHealth or LORAWaN):ti,ab
10. #1 or #2 or #3 or #4 or #5 or #6 or #7 or #8 or #9
11. surgery or surg\*:ti,ab
12. (oper\* or post\* or outcome\* or peri\$ or "peri-operative period"):ti,ab
13. #11 and #12
14. #10 and #13

**Clinicaltrials.gov**

- mHealth AND surgery AND completed studies
- mobile AND surgery AND completed studies
- phone AND surgery AND completed studies
- pda AND surgery AND completed studies
- text AND surgery AND completed studies
- txt AND surgery AND completed studies
- ipad AND surgery AND completed studies

**WHO International Clinical Trials Registry Platform / Web of Science**

mHealth or mobile or phone or pda or text or txt or ipad and surgery in Intervention
